# Supplementary material for: DNA damage contributes to age-associated differences in SARS-CoV-2 infection
Source: Research Square preprint supplement (doi:10.21203/rs.3.rs-301544/v1), 2021-03-08
Supplement: Supplementary file 1 [file 31984a013e05c4c49e86826f.xlsx]

## Sheet: Organoid culture medium
	Composition (concentration)	Organoid growth medium (OGM)	Organoid differentiation medium (ODM)
	Advanced F12/DMEM	+	+
	HEPES (10 mM)	+	+
	GlutaMAX (2 mM)	+	+
	Penicillin/streptomycin (100 U/ ml)	+	+
	Human Wnt3a (100 ng/ml)	+	-
	Human R-spondin-1 (1 μg/ml)	+	-
	Murine Noggin (100 ng/ml)	+	-
	B27 supplement (1×)	+	+
	Nicotinamide (NMN, 10 mM)	+	-
	A83-01 (500 nM)	+	+
	SB202190 (10 μM)	+	-
	hEGF (50 ng/ml)	+	+
	Y-27632 (10 μM)	+	+
	hGastrin I (10 nM)	+	+
	N-acetylcysteine (1 mM)	+	+
	N2 supplement (1×)	+	+
