# Supplementary material for: DNA damage contributes to age-associated differences in SARS-CoV-2 infection
Source: Research Square preprint supplement (doi:10.21203/rs.3.rs-301544/v1), 2021-03-08
Supplement: Supplementary file 2 [file 546ea87f62f209a4581ee5e7.xlsx]

## Sheet: Ciliated2.bimod.diff.markers-cl
	p_val	avg_logFC	pct.1	pct.2
ACE2	1.37e-170	1.27801	1	0
CREBRF	0.000156051	0.259485	0.5	0.289
DDIT3	4.63e-05	0.258969	0.427	0.222
SLC7A11	0.000140319	0.258669	0.355	0.172
KIAA0040	0.00190736	0.238842	0.218	0.102
GYG1	0.000780431	0.238301	0.364	0.191
C12orf76	0.00185906	0.237298	0.418	0.243
PMAIP1	6.98e-06	0.236634	0.7	0.457
FCGBP	0.000299808	0.236172	0.518	0.319
SP1	0.00124234	0.229438	0.336	0.176
IDO1	7.66e-08	0.227448	0.827	0.572
DCAF12	0.00167271	0.224458	0.391	0.222
SENP2	0.000341712	0.220058	0.382	0.205
SAA4	0.000198586	0.217927	0.673	0.47
JUNB	9.19e-05	0.217862	0.636	0.419
BTBD6	0.00844308	0.216301	0.227	0.112
OAS3	0.00515337	0.214749	0.336	0.192
GDF15	0.000520003	0.214631	0.7	0.509
CMPK2	0.00207522	0.214192	0.227	0.105
FOSB	0.00325752	0.213703	0.364	0.21
IER2	4.3e-05	0.213633	0.664	0.438
PRKAA2	2.36e-05	0.213038	0.545	0.33
CLEC2B	0.00180958	0.207599	0.364	0.205
TGM2	3.23e-05	0.207483	0.764	0.54
RAF1	0.00109676	0.205727	0.427	0.253
PAX9	0.00249805	0.204925	0.164	0.058
NLRC5	0.000396983	0.20395	0.291	0.142
UBQLN1	0.0148071	0.203893	0.491	0.339
RP11-488L18.10	0.00369057	0.203292	0.136	0.046
CD4	0.0127179	0.202874	0.218	0.105
PTP4A1	0.013516	0.20281	0.5	0.346
DUOXA2	1.31e-05	0.20134	0.664	0.46
C6orf47	0.00671858	0.20023	0.245	0.123
CAMK1D	7.3e-05	0.200063	0.573	0.368
KCNS3	0.0021382	0.19997	0.145	0.046
IPO7	0.000375401	0.199095	0.455	0.273
BSPRY	0.00395443	0.198453	0.573	0.395
ABHD3	0.00395116	0.198079	0.327	0.184
NFE2L3	0.00051117	0.197448	0.427	0.253
DUSP5	0.00950313	0.196238	0.227	0.111
ICAM1	0.00892895	0.19592	0.209	0.105
ICT1	0.0122323	0.195861	0.464	0.309
CYR61	0.000430458	0.194887	0.227	0.107
PITPNC1	0.00211005	0.193049	0.218	0.096
MUC13	0.00104941	0.19265	0.436	0.268
TNFRSF12A	0.0167852	0.192512	0.309	0.18
JUN	0.00128822	0.192404	0.745	0.558
SAMD9L	0.00189365	0.192212	0.582	0.411
ARID2	0.0292321	0.191539	0.264	0.149
TRAK2	0.0081259	0.190172	0.345	0.205
HDAC3	0.00101738	0.190083	0.336	0.182
MAFF	0.00347315	0.189712	0.355	0.21
PEX19	0.00364425	0.189154	0.282	0.157
BTN3A1	0.00048762	0.188758	0.255	0.119
UNC119B	0.00520358	0.188439	0.591	0.421
SLC26A2	0.000359462	0.188339	0.673	0.474
MED1	0.0184927	0.187709	0.318	0.188
IKBKE	0.00096283	0.187302	0.345	0.192
GDA	0.0021281	0.186445	0.236	0.115
SLC22A5	0.0271485	0.185888	0.164	0.08
ALPL	0.0046752	0.185809	0.282	0.153
AMMECR1L	0.00610093	0.185267	0.145	0.052
ATP13A3	0.00619713	0.184658	0.436	0.281
STK24	0.0077128	0.184555	0.536	0.371
ZDHHC1	0.000931498	0.184273	0.536	0.354
GLRX2	0.030396	0.18341	0.291	0.174
FAM168B	0.00163438	0.182388	0.364	0.213
NGRN	0.0179322	0.181587	0.2	0.099
SERINC2	0.0108866	0.181561	0.618	0.453
HEXIM1	0.0120086	0.181365	0.282	0.16
RP11-250B2.3	0.0396361	0.181201	0.2	0.103
NMRK1	0.0111676	0.181005	0.427	0.278
FOS	0.00122699	0.180505	0.618	0.445
CDHR4	0.00913299	-0.180215	0.536	0.608
RALGPS1	0.00482463	-0.182393	0.145	0.208
RP11-356I2.4	0.000349069	-0.182503	0.091	0.142
CCDC58	0.0256155	-0.182861	0.091	0.163
TRAPPC9	9.75e-05	-0.183475	0.082	0.141
BDH2	0.000724132	-0.185015	0.164	0.232
PTN	0.001884	-0.186316	0.5	0.587
CFAP47	0.00568624	-0.187726	0.318	0.392
CLK3	0.026019	-0.187755	0.082	0.16
RPP25L	0.0026805	-0.188079	0.164	0.234
ANKRD13D	3.25e-05	-0.188192	0.255	0.306
COX15	0.0317661	-0.189155	0.127	0.205
PTGR2	0.00241346	-0.190572	0.173	0.235
PPP1R3E	0.0111375	-0.196541	0.109	0.17
UCN3	0.00766984	-0.196562	0.109	0.19
PRPSAP2	0.00365599	-0.199388	0.082	0.165
HNRNPAB	0.00113144	-0.201896	0.455	0.535
NRG4	0.000244273	-0.202073	0.027	0.107
DGKZ	0.00354228	-0.203647	0.191	0.268
CCDC180	0.00308383	-0.204625	0.473	0.574
CCDC14	0.00989725	-0.20533	0.091	0.165
ANKRD54	0.000375198	-0.209081	0.391	0.491
RNF169	0.000565515	-0.210318	0.136	0.201
MTIF2	0.000286832	-0.23728	0.255	0.358
ZNF3	0.00029145	-0.240195	0.282	0.37
SLC38A6	0.000524299	-0.279173	0.191	0.312
