# Supplementary material for: DNA damage contributes to age-associated differences in SARS-CoV-2 infection
Source: Research Square preprint supplement (doi:10.21203/rs.3.rs-301544/v1), 2021-03-08
Supplement: Supplementary file 3 [file 9f46c5ba443d926e92883259.xlsx]

## Sheet: siRNAs
gene symbol	siRNA target sequence (5'―3')
ATM	AGTCTAGTACTTAATGATCTGCTTA	stealth siRNA
ATR	CAGCTCGTCTCTAAACCCTTCTAAA	stealth siRNA
c-Jun-1	GGCACAGCTTAAACAGAAATT	siRNA
c-Jun-2	GGGUGCCAACUCAUGCUAATT	siRNA
p53	GAGTGCATTGTGAGGGTTA	siRNA
Stat1	CAACTATATTATCATGCAA	siRNA
GATA4	GGACATAATCACTGCGTAA	siRNA
E2F1	TGGACCACCTGATGAATAT	siRNA
SP1	AATGAGAACAGCAACAACTCC	siRNA
FOXA1	TCTAGTTTGTGGAGGGTTA	siRNA
PES1	ACCCAAACACAAGAAGAAGGUUAAC	stealth siRNA
WDR12	CACAGCGTTTGAGAAGCGATGCTTT	stealth siRNA
