# Supplementary material for: DNA damage contributes to age-associated differences in SARS-CoV-2 infection
Source: Research Square preprint supplement (doi:10.21203/rs.3.rs-301544/v1), 2021-03-08
Supplement: Supplementary file 4 [file a7efaae4bcd64d90520830ce.xlsx]

## Sheet: primers and sequences
	primer sequence (5'-3')
SARS-CoV-S-F	GGGAGACCCAAGCTTGGTACC ACCATGTTCATCTTCCTGCTGTTCC
SARS-CoV-S-R	GTGTGATGGATATCTGCAGAATTC TTA ACAGGAGCCACACGAGCAAGCTC
SARS-CoV-2-S-F	GGGAGACCCAAGCTTGGTACC ACCATGTTTGTGTTCCTGGTGCTGC
SARS-CoV-2-S-R	GTGTGATGGATATCTGCAGAATTC TTAACAACAGGAGCCACAGGAAC
MERS-S-F	GGGAGACCCAAGCTTGGTACC ACCATGATTCACTCTGTGTTCCTGCTG
MERS-S-R	GTGTGATGGATATCTGCAGAATTC TTAGCAGCACCTGTTGCACTTCA
Myc-EGFP-F	GGCGCCTACTCTAGAGCTAGC GCCACCATGGAACAAAAGTTG
Myc-EGFP-R	CCTCTGCCCTCAGCGGCCGC CTTGTACAGCTCGTCCATGC
pCDH-Luc-F	CCATAGAAGATTCTAGAGCTAGC GCCACCATGGAAGACGCCA
pCDH-Luc-R	CTTCGCGGCCGCGGATCC TTACACGGCGATCTTTCCGCC
POT1ΔOB-F	GGATGACGACGATAAGGGATCC GAGGACCACAAAATGGTAGAAGC
POT1ΔOB-R	CTCTGCCCTCAGCGGCCGC GATTACATCTTCTGCAACTGTGGT
TPP1-F	GGATGACGACGATAAGGGATCC CCTGGCCGCTGTCAGAGT
TPP1ΔRD-R	CTGGTGGGGG TGAAAGGTGCTCCTCAAGGCA
TPP1ΔRD-F	AGCACCTTTCA CCCCCACCAGACCCGGCT
TPP1-R	CTCTGCCCTCAGCGGCCGC CATCGGAGTTGGCTCAGACC
sgTERC-NAR-F	CACCG agcgagaaaaacagcgcgcg
sgTERC-NAR-R	AAAC cgcgcgctgtttttctcgct C
sgTERC-pro-F	CACCG actacagcagaatcttgtct
sgTERC-pro-R	AAAC agacaagattctgctgtagt C
	Codon-optimized gene sequence
SARS-CoV S glycoprotein	ATGTTCATCTTCCTGCTGTTCCTGACCCTGACCTCTGGCTCTGACCTGGACAGGTGTACCACCTTTGATGATGTCCAGGCTCCAAACTACACCCAACACACCTCCAGTATGAGGGGAGTCTACTACCCTGATGAGATTTTCAGGTCTGACACCCTCTACCTGACCCAGGACCTGTTCCTGCCATTCTACAGCAATGTGACAGGCTTCCACACCATCAACCACACCTTTGACAACCCTGTGATTCCATTCAAGGATGGCATCTACTTTGCTGCCACAGAGAAGAGCAATGTGGTGAGGGGCTGGGTGTTTGGCAGCACAATGAACAACAAGAGCCAGTCTGTGATTATCATCAACAACAGCACCAATGTGGTGATTAGGGCTTGTAACTTTGAACTGTGT…
SARS-CoV-2 S glycoprotein	ATGTTTGTGTTCCTGGTGCTGCTGCCACTGGTGTCCAGCCAGTGTGTGAACCTGACCACCAGGACCCAACTTCCTCCTGCCTACACCAACTCCTTCACCAGGGGAGTCTACTACCCTGACAAGGTGTTCAGGTCCTCTGTGCTGCACAGCACCCAGGACCTGTTCCTGCCATTCTTCAGCAATGTGACCTGGTTCCATGCCATCCATGTGTCTGGCACCAATGGCACCAAGAGGTTTGACAACCCTGTGCTGCCATTCAATGATGGAGTCTACTTTGCCAGCACAGAGAAGAGCAACATCATCAGGGGCTGGATTTTTGGCACCACCCTGGACAGCAAGACCCAGTCCCTGCTGATTGTGAACAATGCCACCAATGTGGTGATTAAGGTGTGTGAGTTC…
MERS-CoV S glycoprotein	ATGATTCACTCTGTGTTCCTGCTGATGTTCCTGCTGACACCAACAGAGTCCTATGTGGATGTGGGACCTGACTCTGTGAAGTCTGCCTGTATTGAGGTGGACATCCAACAGACCTTCTTTGACAAGACCTGGCCAAGACCAATTGATGTGAGCAAGGCTGATGGCATCATCTACCCACAGGGCAGGACCTACAGCAACATCACCATCACCTACCAGGGACTGTTTCCATACCAGGGAGATCATGGAGATATGTATGTCTACTCTGCTGGTCATGCCACAGGCACCACACCACAGAAACTGTTTGTGGCTAACTACAGCCAGGATGTGAAGCAGTTTGCCAATGGCTTTGTGGTGAGGATTGGAGCAGCAGCCAACAGCACAGGCACAGTGATTATCAGC…
